# Supplementary material for: A successive ionic layer adsorption and reaction (SILAR) method to induce Mn3O4nanospots on CNTs for supercapacitors
Source: Royal Society of Chemistry journal article supplement (doi:10.1039/c2nj40862g), 2012-10-17
Supplement: c2nj40862g.pdf [file c2nj40862g.pdf]

# Successive Ionic Layer Adsorption and Reaction (SILAR) Method to Induce $\text{Mn}_3\text{O}_4$ Nanospots on CNTs for Supercapacitor

*Deepak P. Dubal, Rudolf Holze*

[\*] Prof. Rudolf Holze

<sup>a</sup>Technische Universität Chemnitz, Institut für Chemie, AG Elektrochemie,

D-09107 Chemnitz, Germany

E-mail: [rudolf.holze@chemie.tu-chemnitz.de](mailto:rudolf.holze@chemie.tu-chemnitz.de)

## **AUTHOR EMAIL ADDRESS**

Dr. Deepak P. Dubal

[deepak.dubal@chemie.tu-chemnitz.de](mailto:deepak.dubal@chemie.tu-chemnitz.de)

Prof. Rudolf Holze\*

[rudolf.holze@chemie.tu-chemnitz.de](mailto:rudolf.holze@chemie.tu-chemnitz.de)

### Supporting information, S1

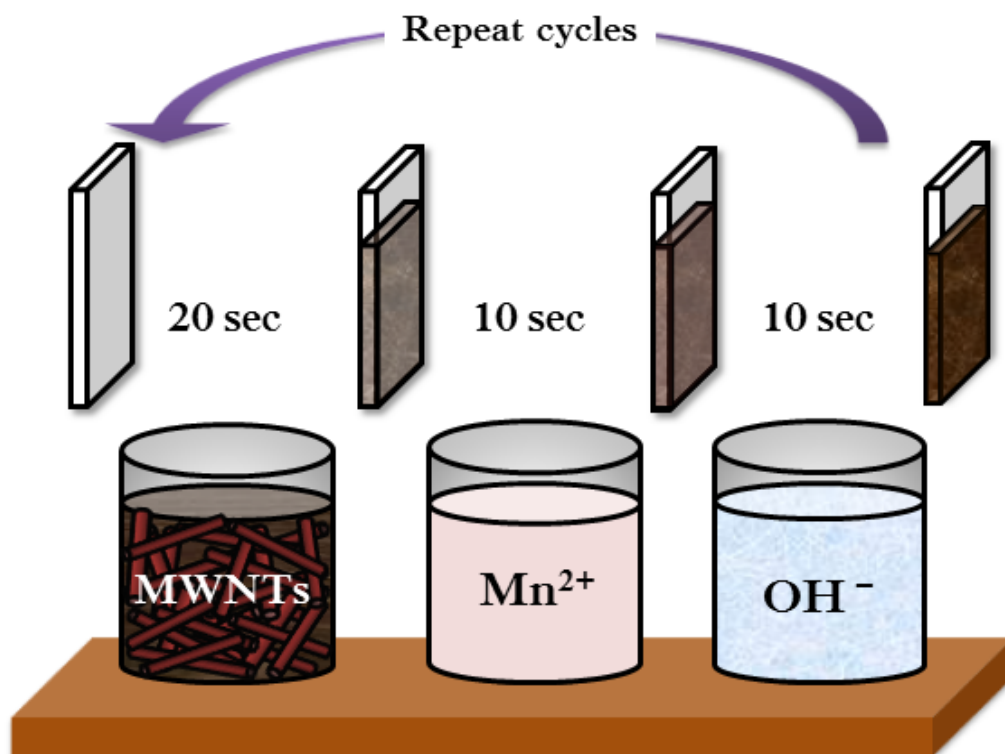

**Figure S1. Schematic of experimental set up used for the deposition of Mn<sub>3</sub>O<sub>4</sub>/CNTs composite thin films**

Supporting information, S2

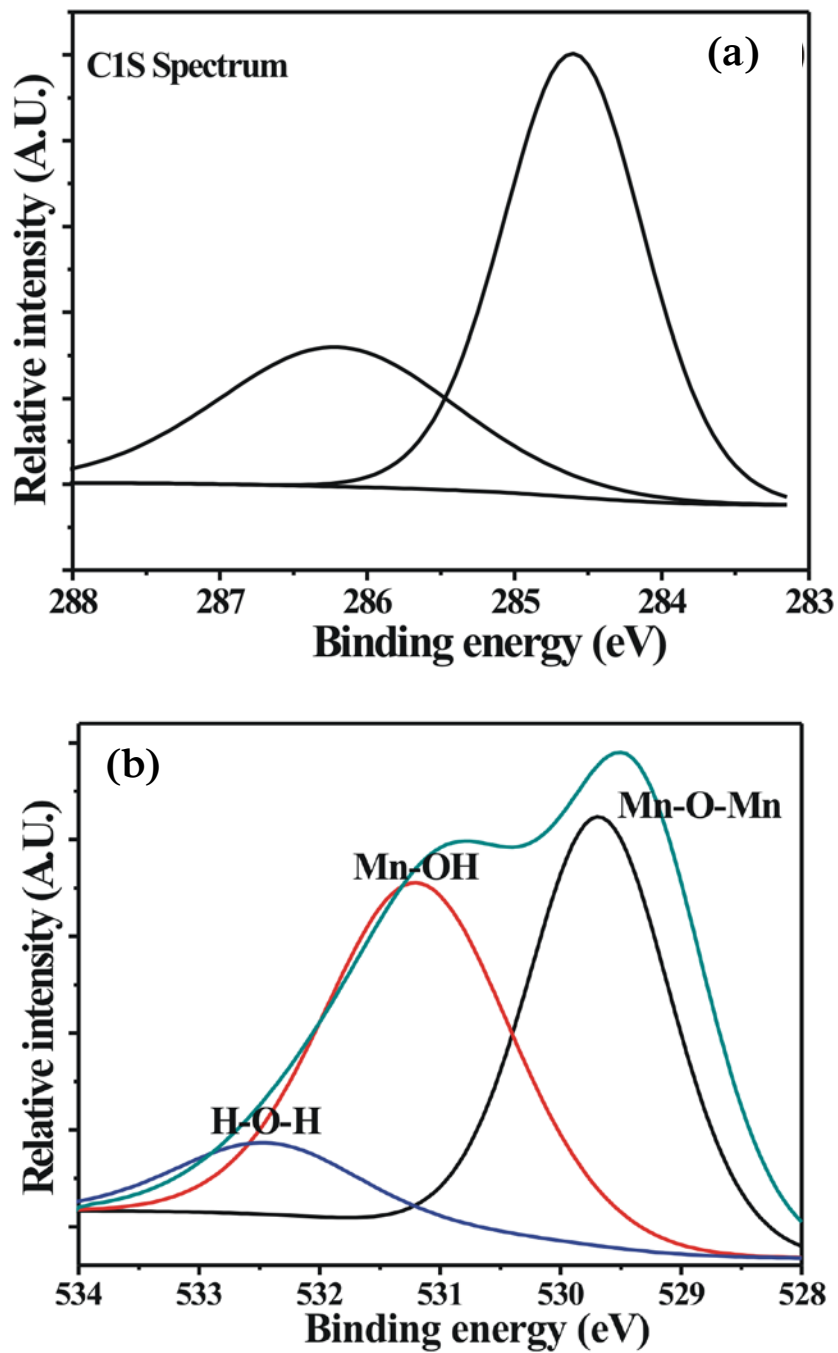

Figure S2. XPS spectra of (a) C1S and (b) O1S of  $\text{Mn}_3\text{O}_4/\text{CNT}$  sample

### Supporting information, S3

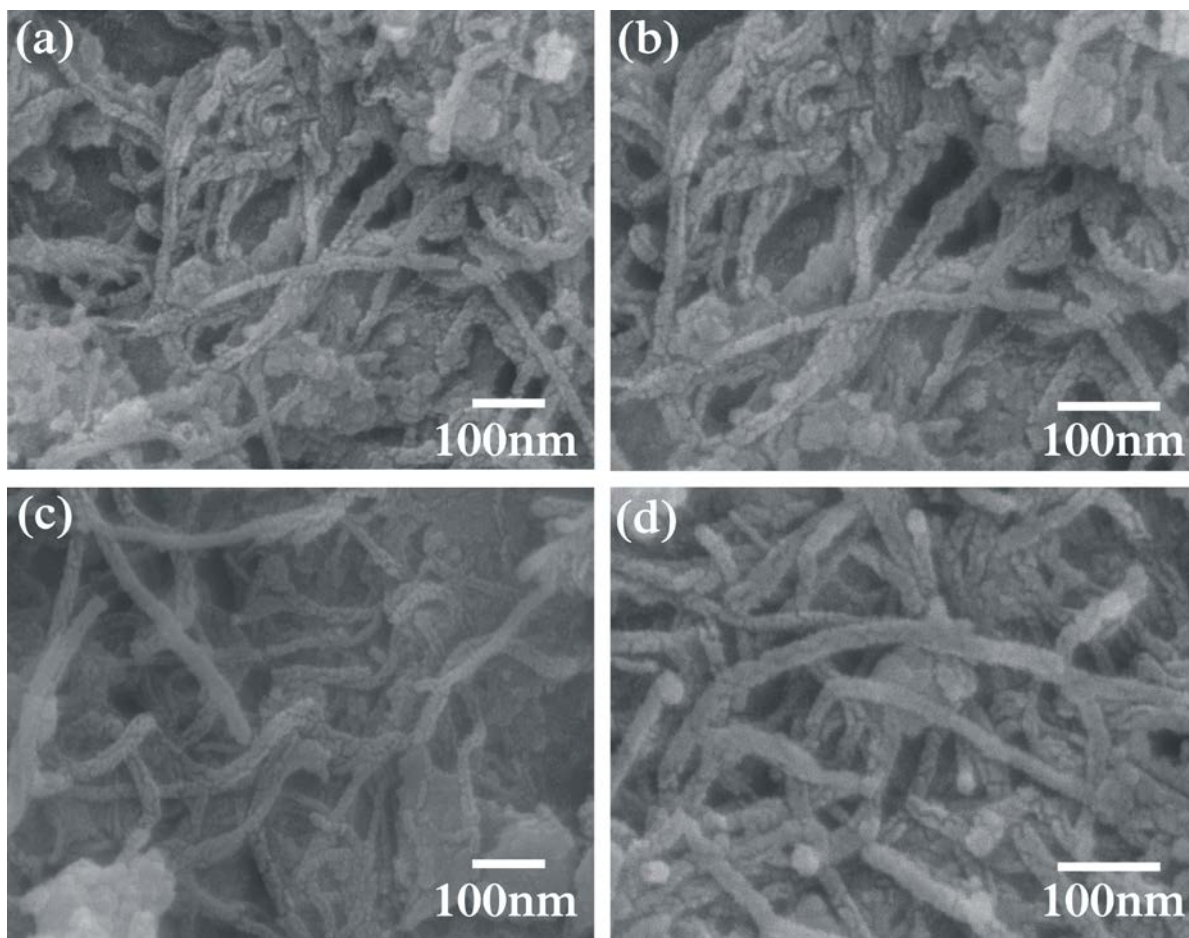

**Figure S3. SEM images of Mn<sub>3</sub>O<sub>4</sub>/CNT composite thin films at different mass loadings (a- b) for 60 SILAR cycles (c and d) for 90 SILAR cycles**

As seen from the SEM images it is confirmed that the Mn<sub>3</sub>O<sub>4</sub> nanoparticles of size around less than 10 nm are induced on the walls of CNTs. Due to the ion by ion growth mechanism no aggregation of nanoparticles on the walls of CNTs has been observed.
